# Supplementary material
Source: PubMed Central journal article supplement (PMC5473156)
Supplement: NIHMS852250-supplement-Online_Supplement.pdf [file NIHMS852250-supplement-Online_Supplement.pdf]

## Online Supplement

### **CABG Versus PCI: Greater Benefit in Long-Term Outcomes With Multiple Arterial Bypass Grafting**

**Short Title:** Optimal Revascularization of Multivessel CAD

Robert H. Habib<sup>1-3</sup>, Kamellia R. Dimitrova<sup>4</sup>, Sanaa A. Badour<sup>2</sup>, Maroun B. Yammine<sup>2</sup>, Abdul-Karim M. El-Hage-Sleiman<sup>2</sup>, Darryl M. Hoffman<sup>4</sup>, Charles M. Geller<sup>4</sup>, Thomas A. Schwann<sup>5</sup>, and Robert F. Tranbaugh<sup>4</sup>

<sup>1</sup>Department of Internal Medicine, <sup>2</sup>Outcomes Research Unit and <sup>3</sup>Vascular Medicine Program, American University of Beirut, Beirut, Lebanon

<sup>4</sup>Department of Cardiovascular Surgery, Mount Sinai Beth Israel Medical Center, New York, NY, USA.

<sup>5</sup>Department of Surgery, University of Toledo College of Medicine, Toledo, OH, USA.

#### **Corresponding Authors**

Robert H. Habib, PhD

American University of Beirut-Medical Center

PO BOX: 11-0236, Riad El Solh, 1107 2020, Beirut, Lebanon

E-mail: [rh106@aub.edu.lb](mailto:rh106@aub.edu.lb)

All authors have no conflict of interest to disclose

Research funded by departmental and Institutional funds. Authors SAB, MBY and AME are funded in part on NIH Training grant 1D43TW009118-01A1 awarded to Scholars in Health Research Program, American University of Beirut, Beirut - Lebanon.

Presented in part as an oral Plenary Session presentation at the American Association for Thoracic Surgeons Meeting, April 26-30, 2014, Toronto, Canada

**Table S-1.** Selected patient demographic, co-morbidity and operative/procedural data compared shown for BMS-PCI and SA-CABG matched pairs subcohorts.

| Patient Factor              | Propensity Matched Cohorts |       |                     |       |
|-----------------------------|----------------------------|-------|---------------------|-------|
|                             | SA-CABG (N=1058)           |       | BMS-PCI (N=1058)    |       |
| Categorical Variables       | Count                      | %     | Count               | %     |
| male                        | 682 <sub>a</sub>           | 64.5% | 687 <sub>a</sub>    | 64.9% |
| BMI Category                |                            |       |                     |       |
| <18                         | 285 <sub>a</sub>           | 26.9% | 296 <sub>a</sub>    | 28.0% |
| 18-24.99                    | 452 <sub>a</sub>           | 42.7% | 433 <sub>a</sub>    | 40.9% |
| 25-29.99                    | 218 <sub>a</sub>           | 20.6% | 230 <sub>a</sub>    | 21.7% |
| 30-34.99                    | 73 <sub>a</sub>            | 6.9%  | 68 <sub>a</sub>     | 6.4%  |
| 25-29.99                    | 24 <sub>a</sub>            | 2.3%  | 21 <sub>a</sub>     | 2.0%  |
| >40                         | 6 <sub>a</sub>             | .6%   | 10 <sub>a</sub>     | .9%   |
| Obese                       | 315 <sub>a</sub>           | 29.8% | 319 <sub>a</sub>    | 30.2% |
| CCS Classification          |                            |       |                     |       |
| 1.0                         | 18 <sub>a</sub>            | 1.7%  | 27 <sub>a</sub>     | 2.6%  |
| 2.0                         | 90 <sub>a</sub>            | 8.5%  | 99 <sub>a</sub>     | 9.4%  |
| 3.0                         | 527 <sub>a</sub>           | 49.8% | 514 <sub>a</sub>    | 48.6% |
| 4.0                         | 423 <sub>a</sub>           | 40.0% | 418 <sub>a</sub>    | 39.5% |
| Previous MI                 | 516 <sub>a</sub>           | 48.8% | 486 <sub>a</sub>    | 45.9% |
| Hypertension                | 782 <sub>a</sub>           | 73.9% | 653 <sub>b</sub>    | 61.7% |
| COPD                        | 133 <sub>a</sub>           | 12.6% | 128 <sub>a</sub>    | 12.1% |
| DIABETES                    | 381 <sub>a</sub>           | 36.0% | 390 <sub>a</sub>    | 36.9% |
| Congestive Heart Failure    | 141 <sub>a</sub>           | 13.3% | 142 <sub>a</sub>    | 13.4% |
| Creatinine > 2.5 mg/dL      | 34 <sub>a</sub>            | 3.2%  | 32 <sub>a</sub>     | 3.0%  |
| Renal Dialysis              | 22 <sub>a</sub>            | 2.1%  | 23 <sub>a</sub>     | 2.2%  |
| Three Vessel Disease        | 763 <sub>a</sub>           | 72.1% | 766 <sub>a</sub>    | 72.4% |
| Two Vessel Disease          | 295 <sub>a</sub>           | 27.9% | 292 <sub>a</sub>    | 27.6% |
| Left Main Disease           | 340 <sub>a</sub>           | 32.1% | 68 <sub>b</sub>     | 6.4%  |
| Off-pump CABG               | 44 <sub>a</sub>            | 4.2%  |                     |       |
| <b><u>Outcomes</u></b>      |                            |       |                     |       |
| In-hospital death           | 5 <sub>a</sub>             | .5%   | 12 <sub>a</sub>     | 1.1%  |
| Reintervention              | 121 <sub>a</sub>           | 11.4% | 409 <sub>b</sub>    | 38.7% |
| <b>Continuous Variables</b> |                            |       |                     |       |
|                             | Mean                       | SD    | Mean                | SD    |
| Age (yrs)                   | 68.10 <sub>a</sub>         | 9.21  | 68.29 <sub>a</sub>  | 11.92 |
| Height (cm)                 | 166.11 <sub>a</sub>        | 9.75  | 166.04 <sub>a</sub> | 9.80  |
| Weight (kg)                 | 77.55 <sub>a</sub>         | 15.70 | 77.23 <sub>a</sub>  | 16.61 |
| BMI (Kg/m <sup>2</sup> )    | 28.08 <sub>a</sub>         | 5.08  | 27.96 <sub>a</sub>  | 5.33  |
| BSA (m <sup>2</sup> )       | 1.88 <sub>a</sub>          | .22   | 1.88 <sub>a</sub>   | .23   |
| Ejection Fraction (%)       | 49.60 <sub>a</sub>         | 12.85 | 49.92 <sub>a</sub>  | 12.92 |

Note: Values in the same row and subtable not sharing the same subscript are significantly different at  $p < .05$  in the two-sided test of equality for column proportions. Cells with no subscript are not included in the test. Tests assume equal variances.<sup>1</sup>

1. Tests are adjusted for all pairwise comparisons within a row of each innermost subtable Using the Bonferroni correction.
2. This category is not used in comparisons because its column proportion is equal to zero or one.

**Table S-2.** Selected patient demographic, co-morbidity and operative/procedural data compared shown for BMS-PCI and MA-CABG matched pairs subcohorts.

| Patient Factor              | Propensity Matched Cohorts |       |                     |       |
|-----------------------------|----------------------------|-------|---------------------|-------|
|                             | MA-CABG (N=746)            |       | BMS-PCI (N=746)     |       |
| Categorical Variables       | Count                      | %     | Count               | %     |
| male                        | 548 <sub>a</sub>           | 73.5% | 572 <sub>a</sub>    | 76.7% |
| BMI Category                |                            |       |                     |       |
| <18                         | 171 <sub>a</sub>           | 22.9% | 169 <sub>a</sub>    | 22.7% |
| 18-24.99                    | 301 <sub>a</sub>           | 40.3% | 289 <sub>a</sub>    | 38.7% |
| 25-29.99                    | 168 <sub>a</sub>           | 22.5% | 179 <sub>a</sub>    | 24.0% |
| 30-34.99                    | 74 <sub>a</sub>            | 9.9%  | 73 <sub>a</sub>     | 9.8%  |
| 25-29.99                    | 28 <sub>a</sub>            | 3.8%  | 31 <sub>a</sub>     | 4.2%  |
| >40                         | 4 <sub>a</sub>             | .5%   | 5 <sub>a</sub>      | .7%   |
| Obese                       | 270 <sub>a</sub>           | 36.2% | 283 <sub>a</sub>    | 37.9% |
| CCS Classification          |                            |       |                     |       |
| 1.0                         | 16 <sub>a</sub>            | 2.1%  | 18 <sub>a</sub>     | 2.4%  |
| 2.0                         | 78 <sub>a</sub>            | 10.5% | 91 <sub>a</sub>     | 12.2% |
| 3.0                         | 367 <sub>a</sub>           | 49.2% | 356 <sub>a</sub>    | 47.7% |
| 4.0                         | 285 <sub>a</sub>           | 38.2% | 281 <sub>a</sub>    | 37.7% |
| Previous MI                 | 320 <sub>a</sub>           | 42.9% | 312 <sub>a</sub>    | 41.8% |
| Hypertension                | 474 <sub>a</sub>           | 63.5% | 464 <sub>a</sub>    | 62.2% |
| COPD                        | 89 <sub>a</sub>            | 11.9% | 82 <sub>a</sub>     | 11.0% |
| DIABETES                    | 252 <sub>a</sub>           | 33.8% | 263 <sub>a</sub>    | 35.3% |
| Congestive Heart Failure    | 53 <sub>a</sub>            | 7.1%  | 55 <sub>a</sub>     | 7.4%  |
| Creatinine > 2.5 mg/dL      | 10 <sub>a</sub>            | 1.3%  | 11 <sub>a</sub>     | 1.5%  |
| Renal Dialysis              | 5 <sub>a</sub>             | .7%   | 8 <sub>a</sub>      | 1.1%  |
| Three Vessel Disease        | 607 <sub>a</sub>           | 81.4% | 608 <sub>a</sub>    | 81.5% |
| Two Vessel Disease          | 139 <sub>a</sub>           | 18.6% | 138 <sub>a</sub>    | 18.5% |
| Left Main Disease           | 216 <sub>a</sub>           | 29.0% | 44 <sub>b</sub>     | 5.9%  |
| Off-pump CABG               | 21 <sub>a</sub>            | 2.8%  |                     |       |
| <b><u>Outcomes</u></b>      |                            |       |                     |       |
| In-hospital death           | 2 <sub>a</sub>             | .3%   | 8 <sub>a</sub>      | 1.1%  |
| Reintervention              | 83 <sub>a</sub>            | 11.1% | 298 <sub>b</sub>    | 39.9% |
| <b>Continuous Variables</b> | Mean                       | SD    | Mean                | SD    |
| Age (yrs)                   | 61.10 <sub>a</sub>         | 8.11  | 61.03 <sub>a</sub>  | 11.46 |
| Height (cm)                 | 168.45 <sub>a</sub>        | 10.26 | 168.72 <sub>a</sub> | 9.61  |
| Weight (kg)                 | 82.14 <sub>a</sub>         | 16.64 | 82.73 <sub>a</sub>  | 17.69 |
| BMI (Kg/m <sup>2</sup> )    | 28.95 <sub>a</sub>         | 5.40  | 29.05 <sub>a</sub>  | 5.66  |
| BSA (m <sup>2</sup> )       | 1.95 <sub>a</sub>          | .23   | 1.96 <sub>a</sub>   | .24   |
| Ejection Fraction (%)       | 51.33 <sub>a</sub>         | 12.12 | 51.19 <sub>a</sub>  | 12.05 |

Note: Values in the same row and subtable not sharing the same subscript are significantly different at  $p < .05$  in the two-sided test of equality for column proportions. Cells with no subscript are not included in the test. Tests assume equal variances.<sup>1</sup>

1. Tests are adjusted for all pairwise comparisons within a row of each innermost subtable Using the Bonferroni correction.
2. This category is not used in comparisons because its column proportion is equal to zero or one.

**Table S-3.** Selected patient demographic, co-morbidity and operative/procedural data compared shown for DES-PCI and SA-CABG matched pairs subcohorts.

| Patient Factor              | Propensity Matched Cohorts |       |                     |       |
|-----------------------------|----------------------------|-------|---------------------|-------|
|                             | SA-CABG (N=677)            |       | DES-PCI (N=677)     |       |
| Categorical Variables       | Count                      | %     | Count               | %     |
| male                        | 450 <sub>a</sub>           | 66.5% | 449 <sub>a</sub>    | 66.3% |
| BMI Category                |                            |       |                     |       |
| <18                         | 190 <sub>a</sub>           | 28.1% | 182 <sub>a</sub>    | 26.9% |
| 18-24.99                    | 274 <sub>a</sub>           | 40.5% | 268 <sub>a</sub>    | 39.6% |
| 25-29.99                    | 149 <sub>a</sub>           | 22.0% | 173 <sub>a</sub>    | 25.6% |
| 30-34.99                    | 48 <sub>a</sub>            | 7.1%  | 40 <sub>a</sub>     | 5.9%  |
| 25-29.99                    | 12 <sub>a</sub>            | 1.8%  | 11 <sub>a</sub>     | 1.6%  |
| >40                         | 4 <sub>a</sub>             | .6%   | 3 <sub>a</sub>      | .4%   |
| Obese                       | 209 <sub>a</sub>           | 30.9% | 224 <sub>a</sub>    | 33.1% |
| CCS Classification          |                            |       |                     |       |
| 1.0                         | 10 <sub>a</sub>            | 1.5%  | 11 <sub>a</sub>     | 1.6%  |
| 2.0                         | 87 <sub>a</sub>            | 12.9% | 74 <sub>a</sub>     | 10.9% |
| 3.0                         | 499 <sub>a</sub>           | 73.7% | 522 <sub>a</sub>    | 77.1% |
| 4.0                         | 81 <sub>a</sub>            | 12.0% | 70 <sub>a</sub>     | 10.3% |
| Previous MI                 | 273 <sub>a</sub>           | 40.3% | 270 <sub>a</sub>    | 39.9% |
| Hypertension                | 502 <sub>a</sub>           | 74.2% | 74 <sub>b</sub>     | 10.9% |
| COPD                        | 69 <sub>a</sub>            | 10.2% | 65 <sub>a</sub>     | 9.6%  |
| DIABETES                    | 272 <sub>a</sub>           | 40.2% | 277 <sub>a</sub>    | 40.9% |
| Congestive Heart Failure    | 62 <sub>a</sub>            | 9.2%  | 70 <sub>a</sub>     | 10.3% |
| Creatinine > 2.5 mg/dL      | 25 <sub>a</sub>            | 3.7%  | 20 <sub>a</sub>     | 3.0%  |
| Renal Dialysis              | 16 <sub>a</sub>            | 2.4%  | 13 <sub>a</sub>     | 1.9%  |
| Three Vessel Disease        | 524 <sub>a</sub>           | 77.4% | 526 <sub>a</sub>    | 77.7% |
| Two Vessel Disease          | 153 <sub>a</sub>           | 22.6% | 151 <sub>a</sub>    | 22.3% |
| Left Main Disease           | 223 <sub>a</sub>           | 32.9% | 61 <sub>b</sub>     | 9.0%  |
| Off-pump CABG               | 28 <sub>a</sub>            | 4.1%  |                     |       |
| <b><u>Outcomes</u></b>      |                            |       |                     |       |
| In-hospital death           | 3 <sub>a</sub>             | .4%   | 4 <sub>a</sub>      | .6%   |
| Reintervention              | 79 <sub>a</sub>            | 11.7% | 324 <sub>b</sub>    | 47.9% |
| <b>Continuous Variables</b> | Mean                       | SD    | Mean                | SD    |
| Age (yrs)                   | 68.03 <sub>a</sub>         | 9.14  | 68.50 <sub>a</sub>  | 12.44 |
| Height (cm)                 | 166.15 <sub>a</sub>        | 9.80  | 166.34 <sub>a</sub> | 9.23  |
| Weight (kg)                 | 77.43 <sub>a</sub>         | 15.49 | 77.99 <sub>a</sub>  | 16.67 |
| BMI (Kg/m <sup>2</sup> )    | 28.02 <sub>a</sub>         | 4.96  | 28.09 <sub>a</sub>  | 5.06  |
| BSA (m <sup>2</sup> )       | 1.88 <sub>a</sub>          | .22   | 1.89 <sub>a</sub>   | .23   |
| Ejection Fraction (%)       | 51.02 <sub>a</sub>         | 12.32 | 51.29 <sub>a</sub>  | 12.68 |

Note: Values in the same row and subtable not sharing the same subscript are significantly different at  $p < .05$  in the two-sided test of equality for column proportions. Cells with no subscript are not included in the test. Tests assume equal variances.<sup>1</sup>

1. Tests are adjusted for all pairwise comparisons within a row of each innermost subtable Using the Bonferroni correction.
2. This category is not used in comparisons because its column proportion is equal to zero or one.

**Table S-4.** Selected patient demographic, co-morbidity and operative/procedural data compared shown for DES-PCI and MA-CABG matched pairs subcohorts.

| Patient Factor              | Propensity Matched Cohorts |       |                     |       |
|-----------------------------|----------------------------|-------|---------------------|-------|
|                             | SA-CABG (N=546)            |       | DES-PCI (N=546)     |       |
| Categorical Variables       | Count                      | %     | Count               | %     |
| male                        | 413 <sub>a</sub>           | 75.6% | 422 <sub>a</sub>    | 77.3% |
| BMI Category                |                            |       |                     |       |
| <18                         | 127 <sub>a</sub>           | 23.3% | 119 <sub>a</sub>    | 21.8% |
| 18-24.99                    | 210 <sub>a</sub>           | 38.5% | 211 <sub>a</sub>    | 38.6% |
| 25-29.99                    | 133 <sub>a</sub>           | 24.4% | 139 <sub>a</sub>    | 25.5% |
| 30-34.99                    | 53 <sub>a</sub>            | 9.7%  | 53 <sub>a</sub>     | 9.7%  |
| 25-29.99                    | 20 <sub>a</sub>            | 3.7%  | 19 <sub>a</sub>     | 3.5%  |
| >40                         | 3 <sub>a</sub>             | .5%   | 5 <sub>a</sub>      | .9%   |
| Obese                       | 206 <sub>a</sub>           | 37.7% | 211 <sub>a</sub>    | 38.6% |
| CCS Classification          |                            |       |                     |       |
| 1.0                         | 9 <sub>a</sub>             | 1.6%  | 9 <sub>a</sub>      | 1.6%  |
| 2.0                         | 85 <sub>a</sub>            | 15.6% | 71 <sub>a</sub>     | 13.0% |
| 3.0                         | 375 <sub>a</sub>           | 68.7% | 402 <sub>a</sub>    | 73.6% |
| 4.0                         | 77 <sub>a</sub>            | 14.1% | 64 <sub>a</sub>     | 11.7% |
| Previous MI                 | 189 <sub>a</sub>           | 34.6% | 184 <sub>a</sub>    | 33.7% |
| Hypertension                | 325 <sub>a</sub>           | 59.5% | 52 <sub>b</sub>     | 9.5%  |
| COPD                        | 33 <sub>a</sub>            | 6.0%  | 46 <sub>a</sub>     | 8.4%  |
| DIABETES                    | 210 <sub>a</sub>           | 38.5% | 202 <sub>a</sub>    | 37.0% |
| Congestive Heart Failure    | 30 <sub>a</sub>            | 5.5%  | 30 <sub>a</sub>     | 5.5%  |
| Creatinine > 2.5 mg/dL      | 5 <sub>a</sub>             | .9%   | 5 <sub>a</sub>      | .9%   |
| Renal Dialysis              | 3 <sub>a</sub>             | .5%   | 4 <sub>a</sub>      | .7%   |
| Three Vessel Disease        | 455 <sub>a</sub>           | 83.3% | 459 <sub>a</sub>    | 84.1% |
| Two Vessel Disease          | 91 <sub>a</sub>            | 16.7% | 87 <sub>a</sub>     | 15.9% |
| Left Main Disease           | 160 <sub>a</sub>           | 29.3% | 45 <sub>b</sub>     | 8.2%  |
| Off-pump CABG               | 12 <sub>a</sub>            | 2.2%  |                     |       |
| <b><u>Outcomes</u></b>      |                            |       |                     |       |
| In-hospital death           | 1 <sub>a</sub>             | .2%   | 1 <sub>a</sub>      | .2%   |
| Reintervention              | 49 <sub>a</sub>            | 9.0%  | 274 <sub>b</sub>    | 50.2% |
| <b>Continuous Variables</b> | Mean                       | SD    | Mean                | SD    |
| Age (yrs)                   | 60.67 <sub>a</sub>         | 8.07  | 60.07 <sub>a</sub>  | 12.76 |
| Height (cm)                 | 168.38 <sub>a</sub>        | 10.20 | 168.40 <sub>a</sub> | 9.08  |
| Weight (kg)                 | 82.18 <sub>a</sub>         | 17.35 | 82.63 <sub>a</sub>  | 18.04 |
| BMI (Kg/m <sup>2</sup> )    | 28.95 <sub>a</sub>         | 5.44  | 29.05 <sub>a</sub>  | 5.61  |
| BSA (m <sup>2</sup> )       | 1.95 <sub>a</sub>          | .24   | 1.96 <sub>a</sub>   | .24   |
| Ejection Fraction (%)       | 53.32 <sub>a</sub>         | 11.60 | 53.74 <sub>a</sub>  | 11.42 |



Note: Values in the same row and subtable not sharing the same subscript are significantly different at  $p < .05$  in the two-sided test of equality for column proportions. Cells with no subscript are not included in the test. Tests assume equal variances.<sup>1</sup>

1. Tests are adjusted for all pairwise comparisons within a row of each innermost subtable Using the Bonferroni correction.
2. This category is not used in comparisons because its column proportion is equal to zero or one.

## Increased Study Eligibility\* Among Available PCI Patients

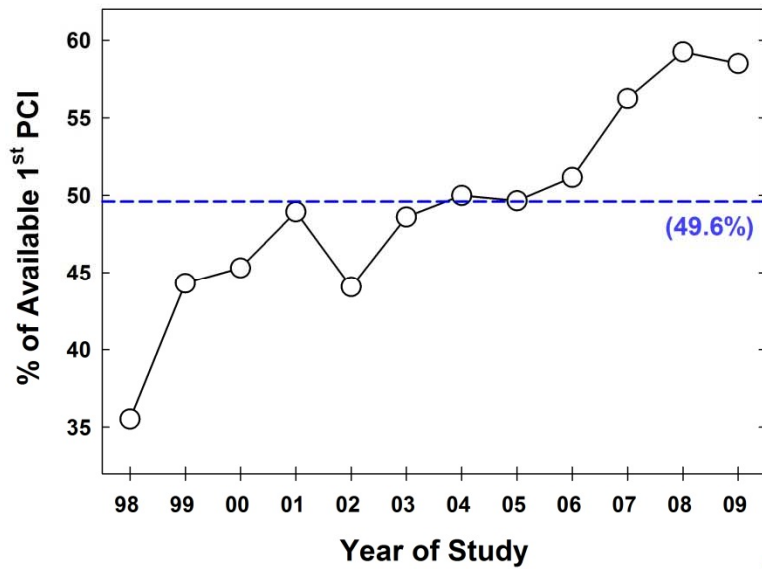

1998-2009  
**1<sup>st</sup> Intervention = PCI**  
 9242 Pts available  
**5488 Pts eligible (49.6%)**

PCI Study Pts  
 2207 BMS  
 +  
2381 DES  
**4588**

\* Study Eligible = Appropriate for CABG

Figure S-1

**Distribution of BMS vs. DES Procedures  
over 12-year Study Period  
(4588 Total PCIs)**

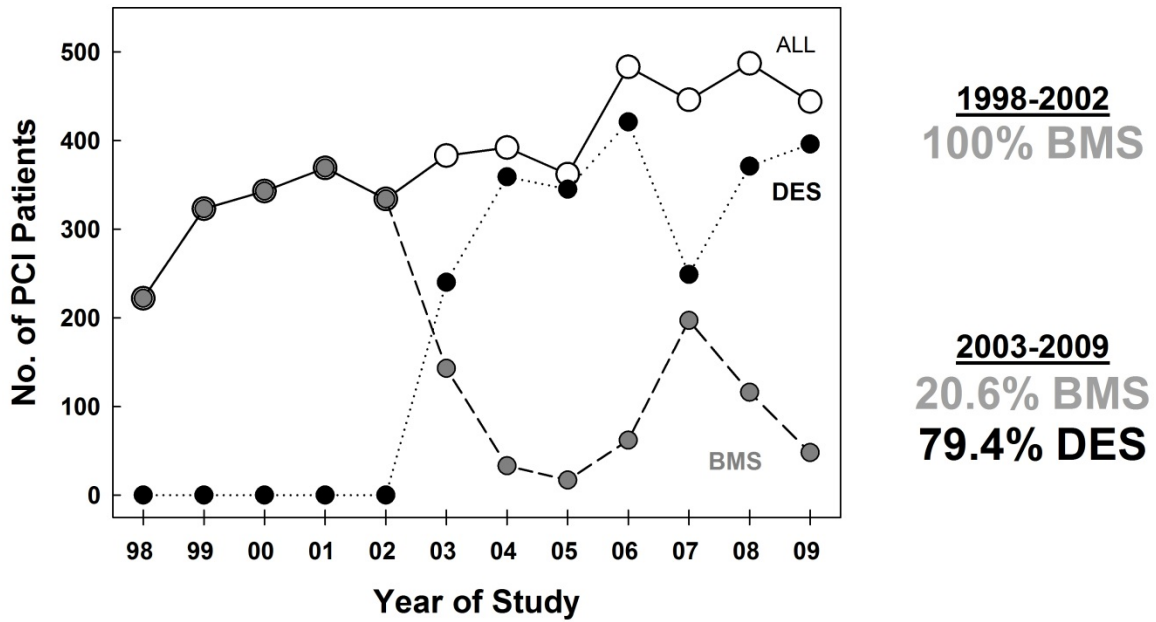

Figure S-2
